# Supplementary material
Source: MDPI journal article supplement (https://www.mdpi.com/search?q=plants-09-00796)
Supplement: s001 [file plants-09-00796-s001.pdf]

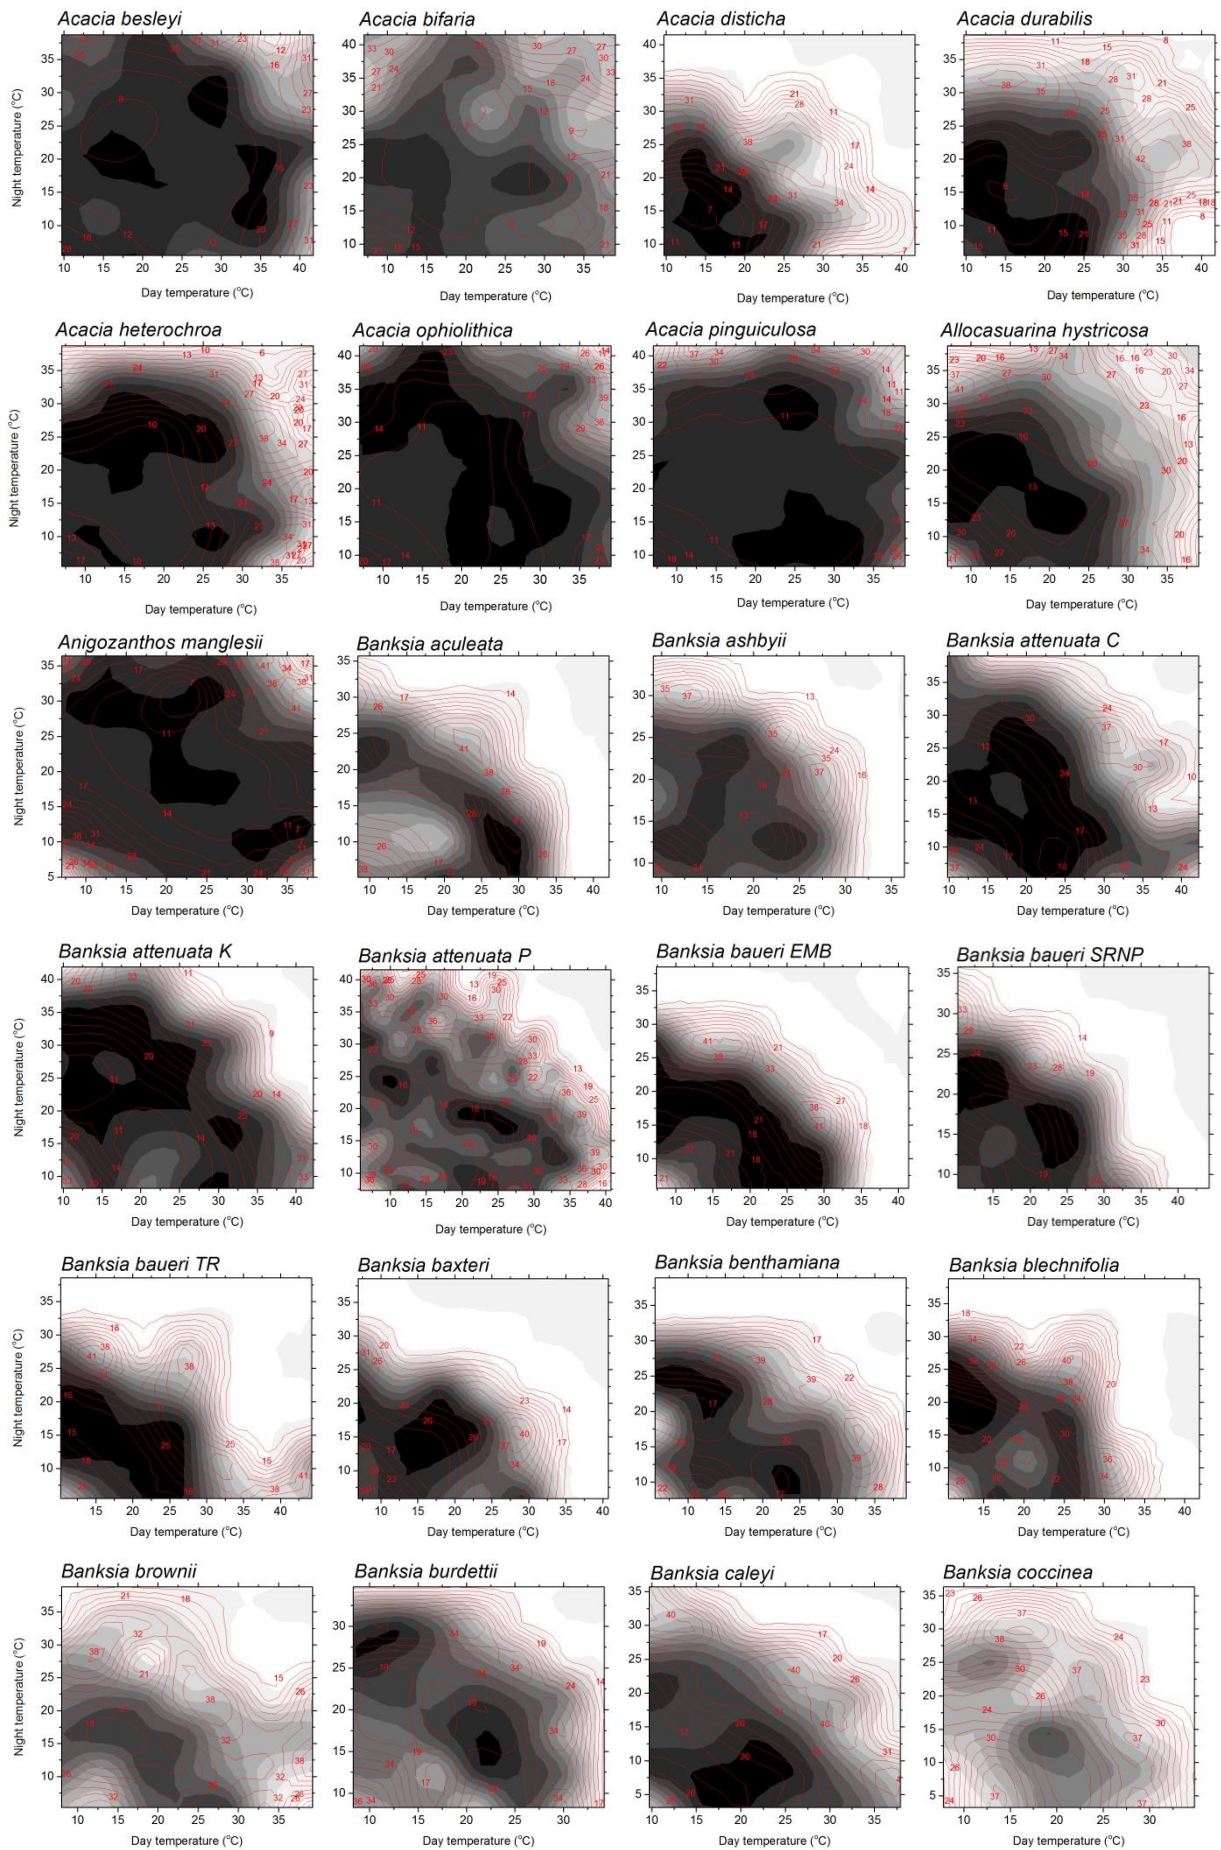



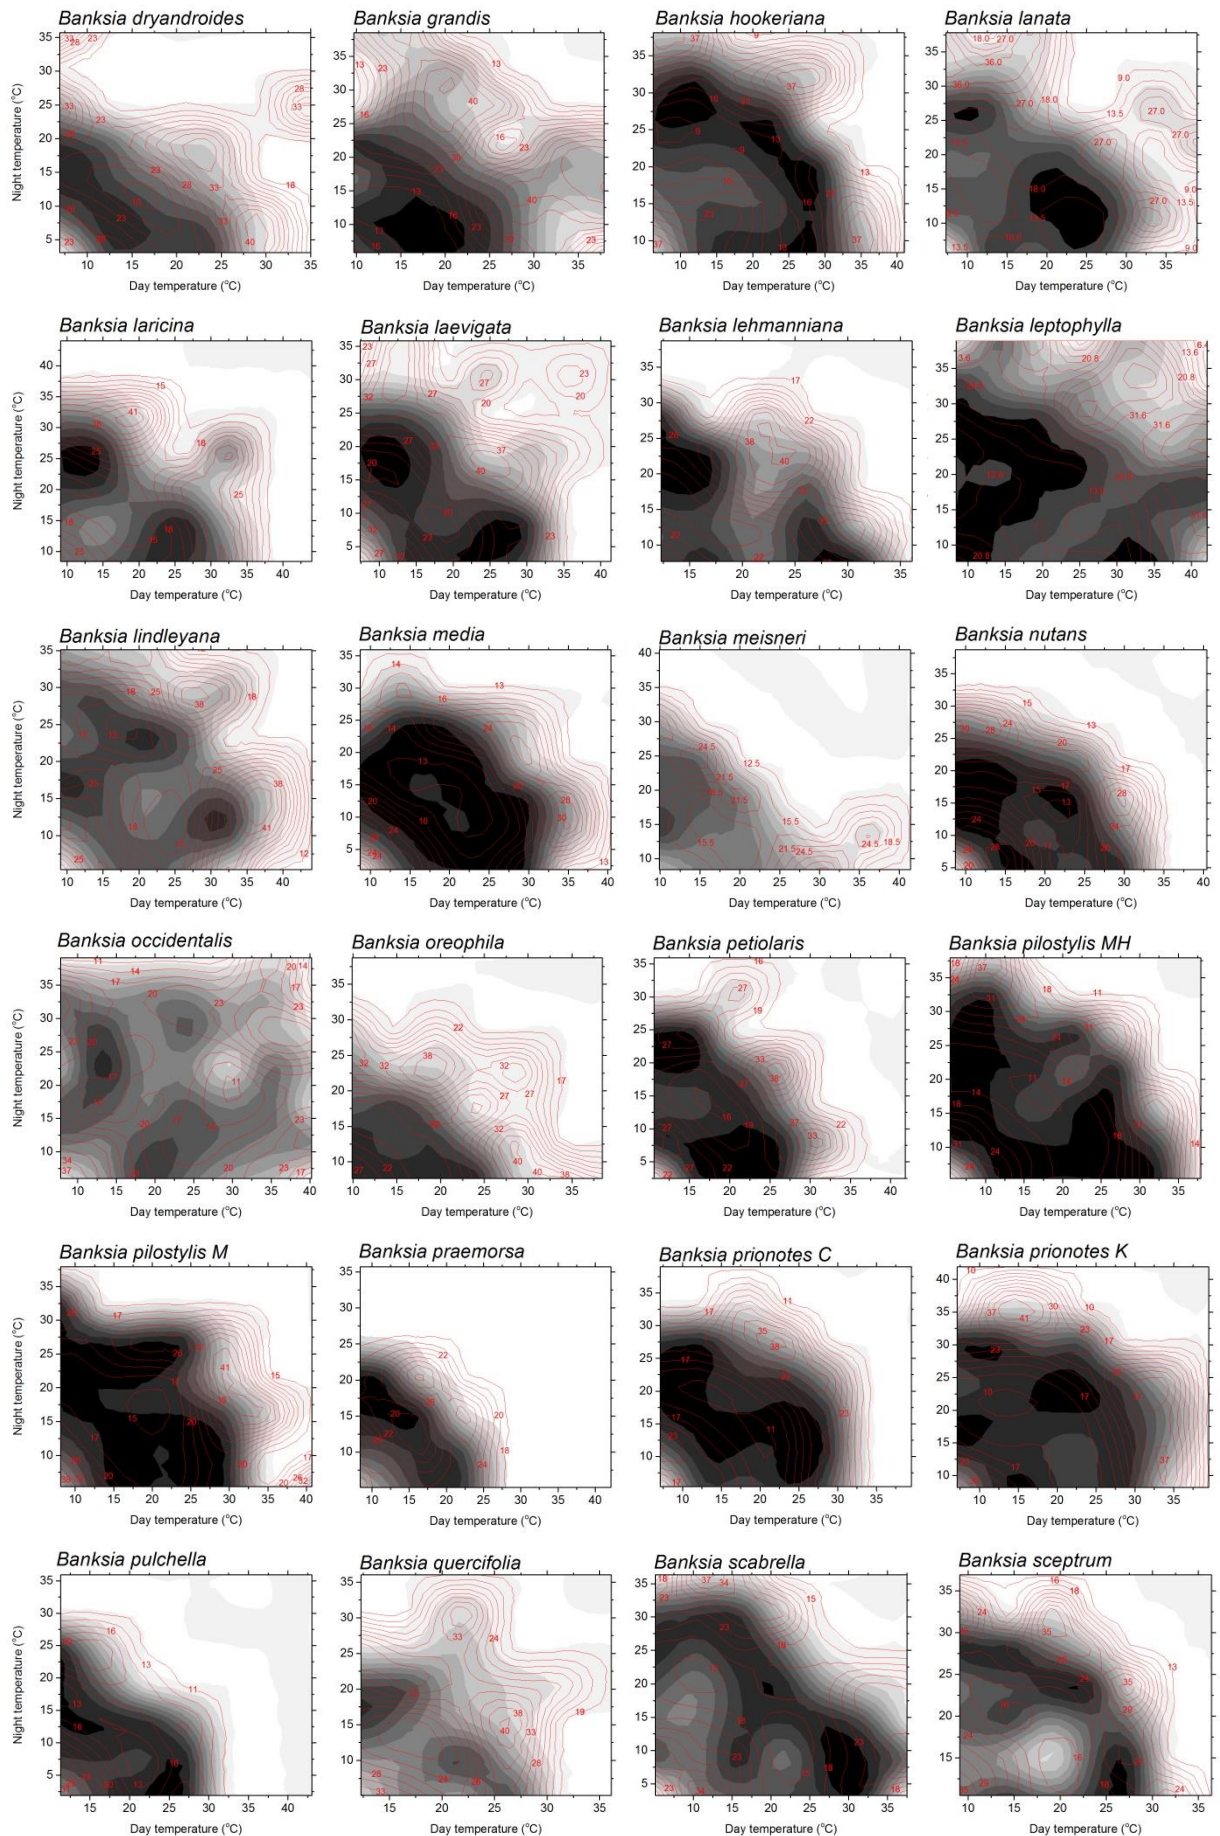



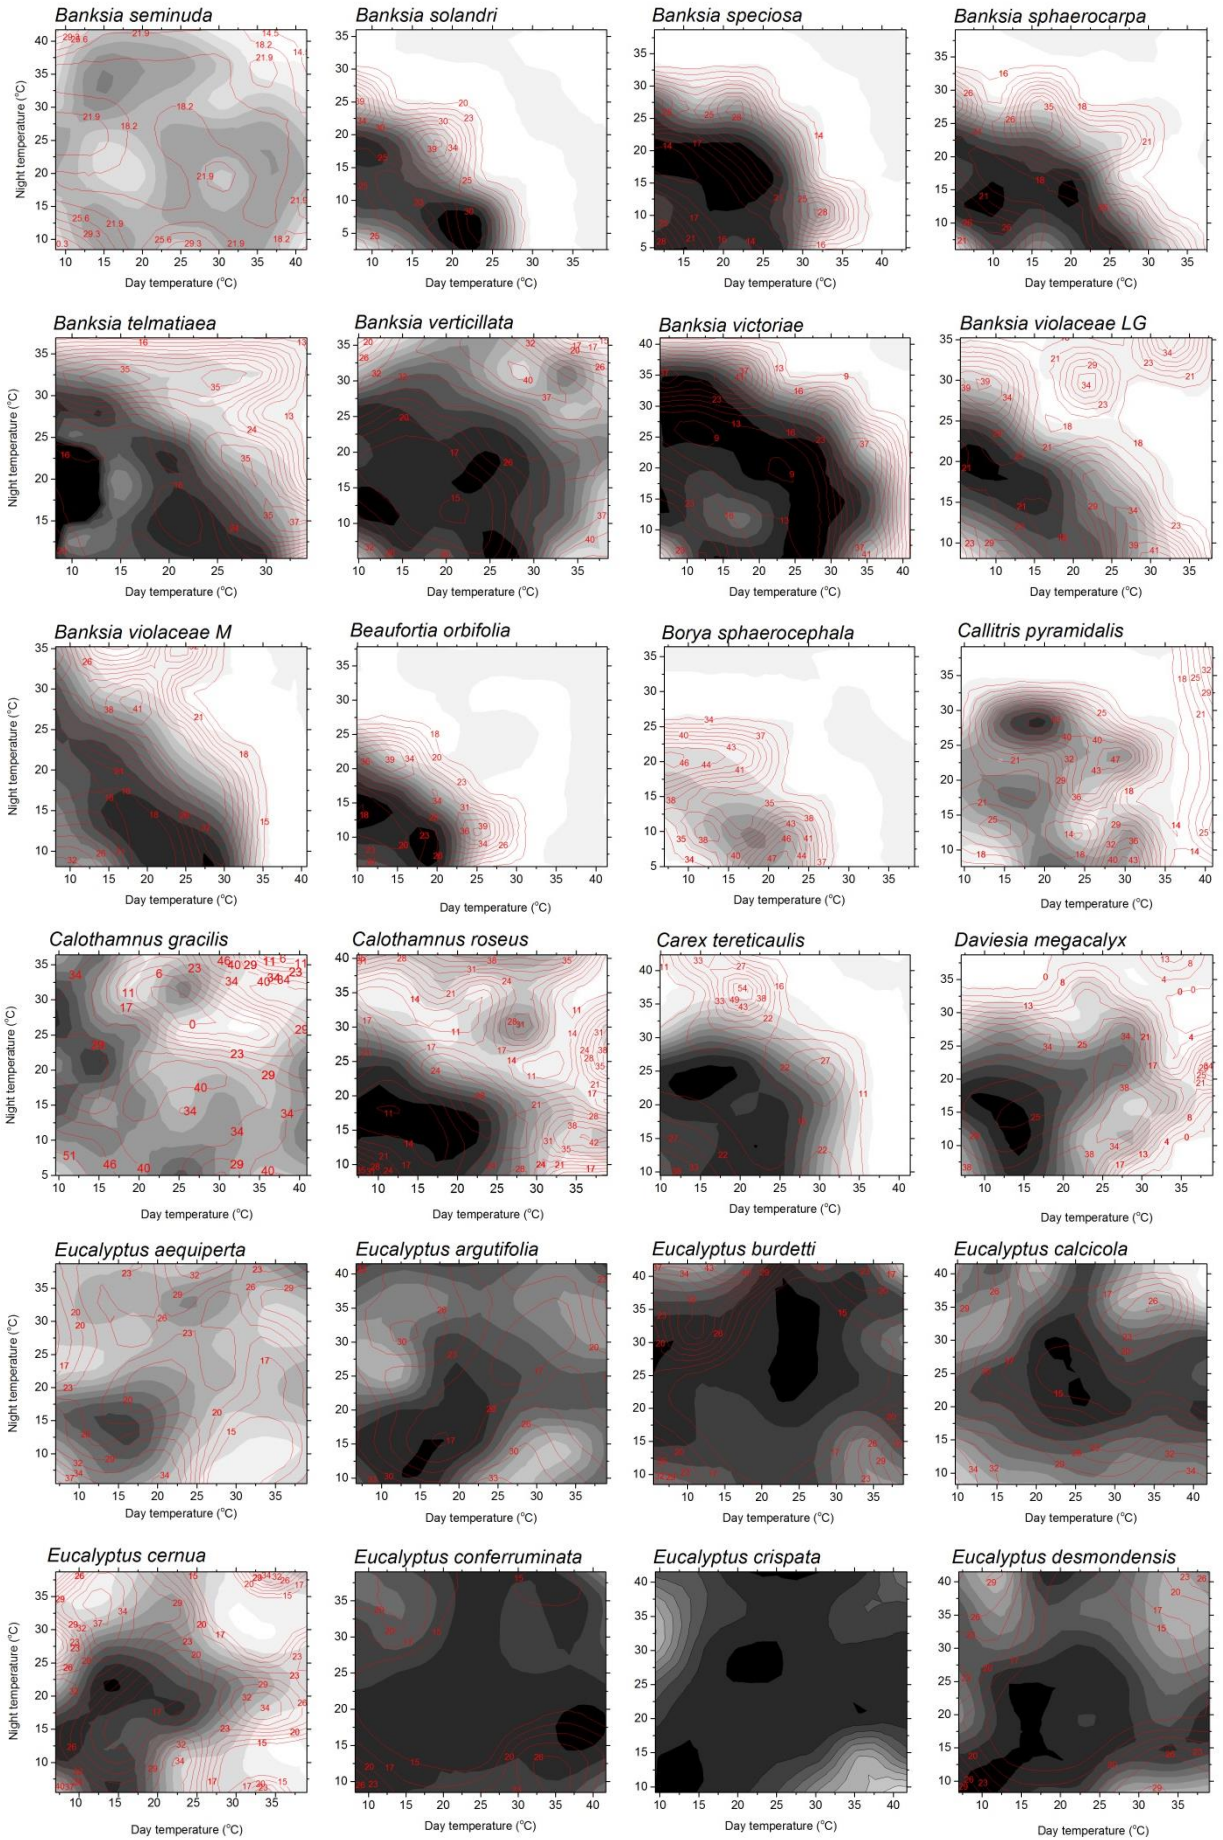



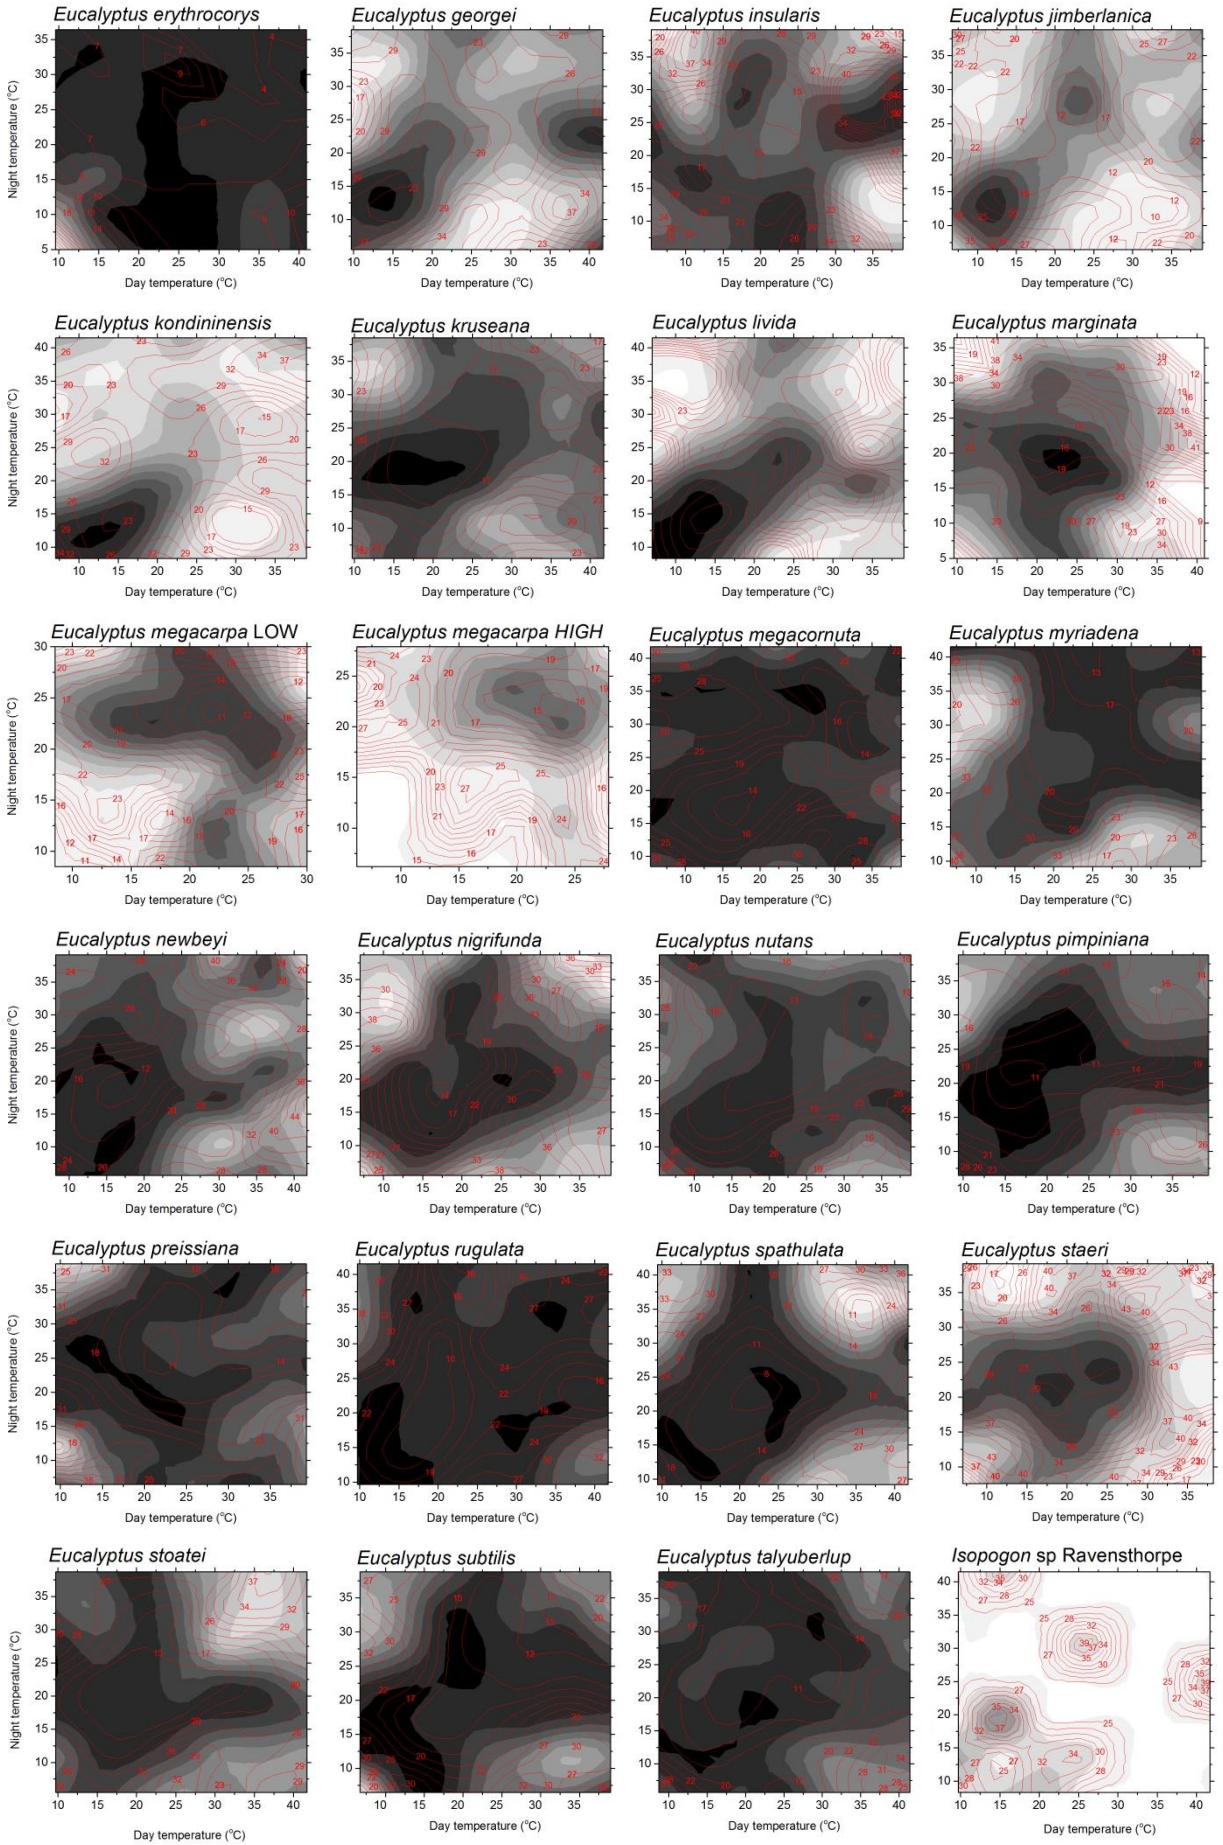

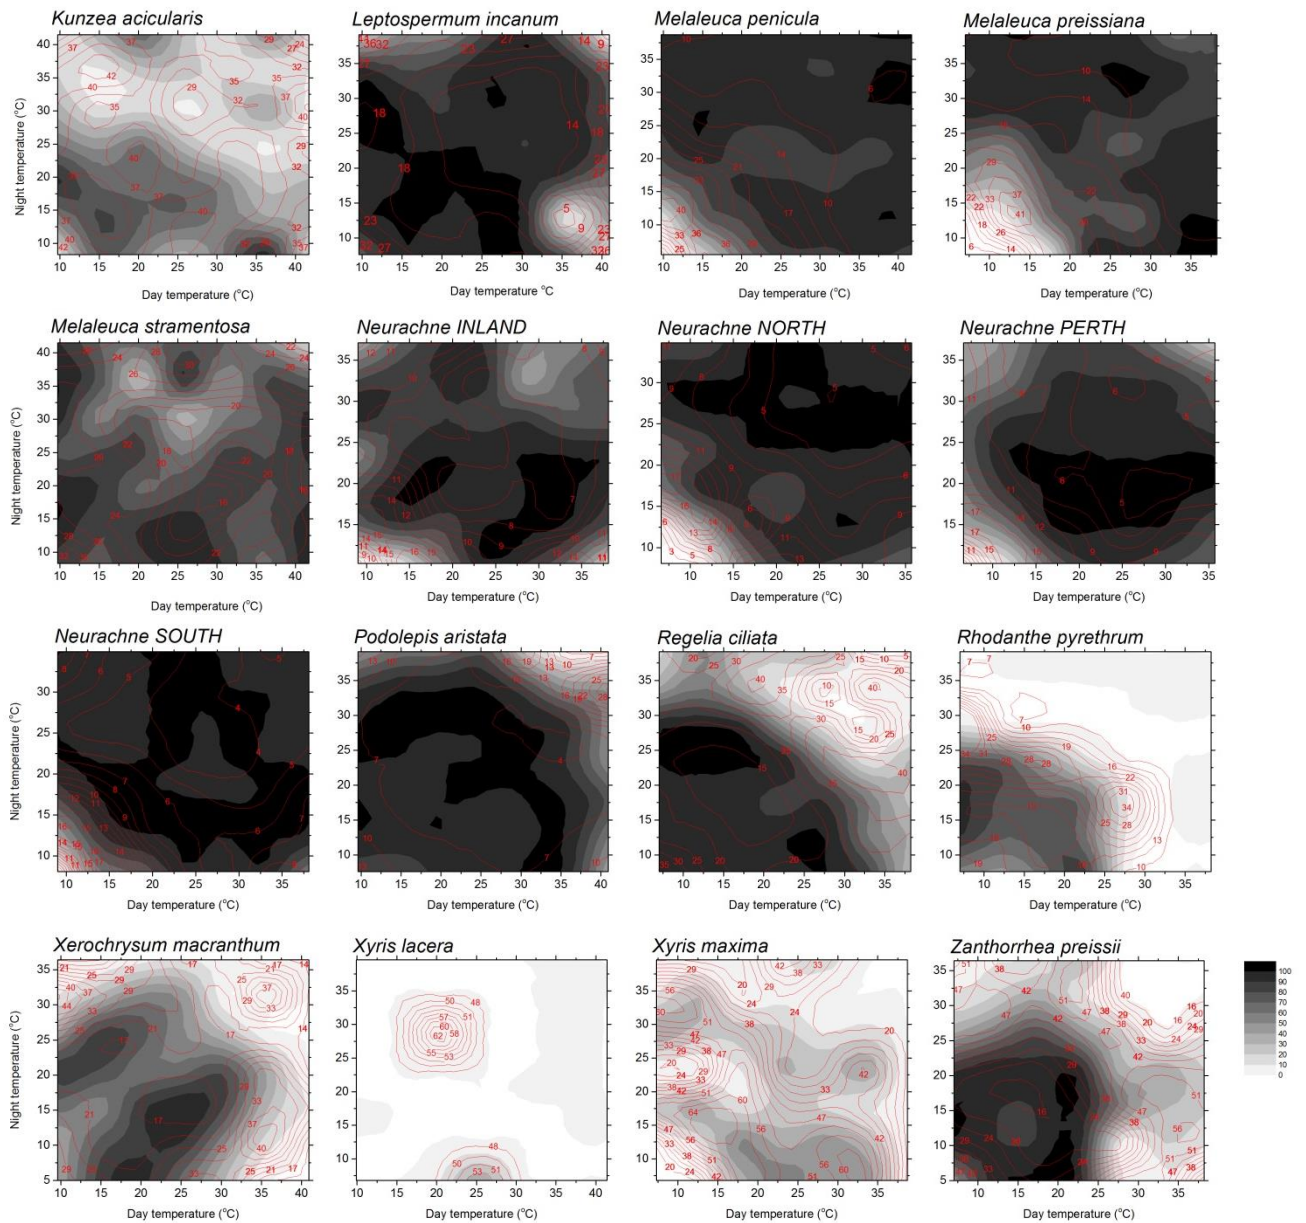

**Figure S1.** Contour plots for observed data for seeds of 113 collections. Points of equal percentage germination are connected by germination isopleths. The gradation in colours from dark (black - 100%) to light (white - 0%) represent decreasing percentage germination. The contour lines within each plot represent mean time to germination at various levels of germination. Constant temperatures are presented on the diagonal line from the bottom-left corner of the diagrams (lowest temperature c. 5°C) to the top-right corner (maximum temperature c. 40°C). All points above and below the diagonal line represent alternating temperature regimes, with greatest amplitude at the top-left and bottom-right corners of each graph. The diagonal line from bottom left to top right corner of each plot signifies the divide between diurnal cycles that have light during the warmer day regime (bottom right section) and dark during the warmer day regime (top left section). Note: The plot for *Stylidium scandens* was not displayed due to poor germination (<10%).
